# Supplementary material
Source: PubMed Central journal article supplement (PMC6208295)
Supplement: mmc1.pdf [file mmc1.pdf]

# Supplementary Figures

Sanders et al. BJA

**Supplementary Figure 1: Models tested by Bayesian model selection – step 1: full model versus feedforward connections only versus feedback connections only.** Numbers 1-8 refer to connection order for parameter estimates as displayed in Figures 2 and 3. PFC = Prefrontal corex, SPL = Superior parietal lobule, IOG = Inferior occipital gyrus. Arrows = linear coupling, Dashed arrows = non-linear coupling.

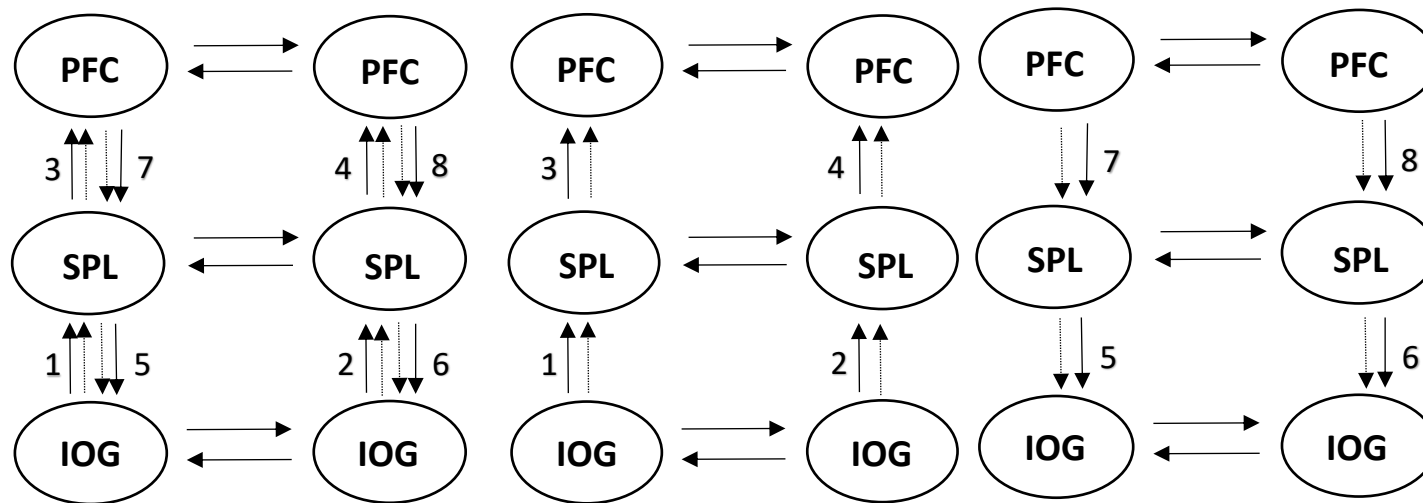

**Supplementary Figure 2: Models tested by Bayesian model selection – step 2: full model versus full with no occipitoparietal connections versus full with no frontoparietal connections.**

Numbers 1-8 refer to connection order for parameter estimates as displayed in Figures 2 and 3. PFC = Prefrontal corex, SPL = Superior parietal lobule, IOG = Inferior occipital gyrus. Arrows = linear coupling, Dashed arrows = non-linear coupling.

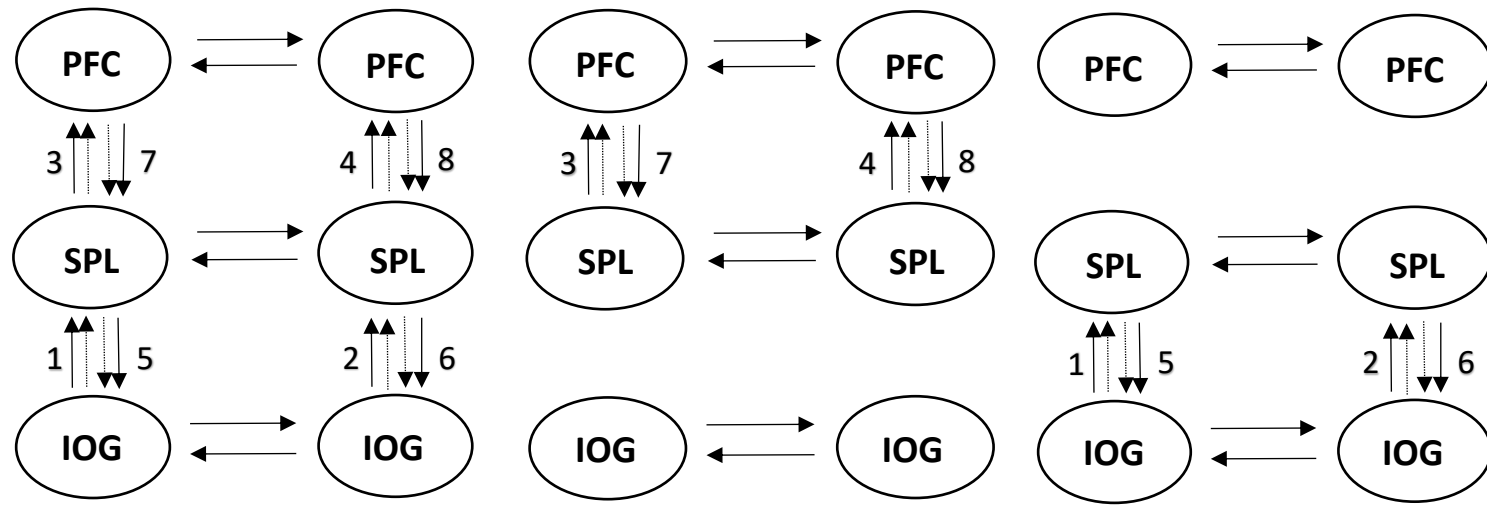

**Supplementary Figure 3: Models tested by Bayesian model selection – step 3: full model versus non-linear cross-frequency coupling versus linear coupling modulations.** Numbers 1-8 refer to connection order for parameter estimates as displayed in Figures 2 and 3. PFC = Prefrontal cortex, SPL = Superior parietal lobule, IOG = Inferior occipital gyrus. Arrows = linear coupling, Dashed arrows = non-linear coupling.

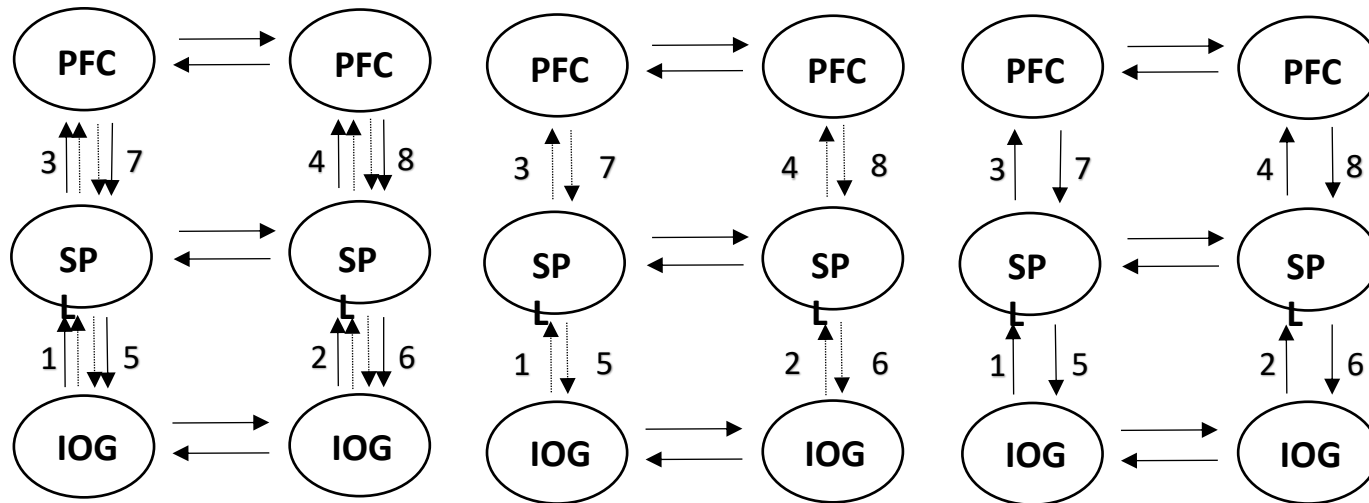

**A**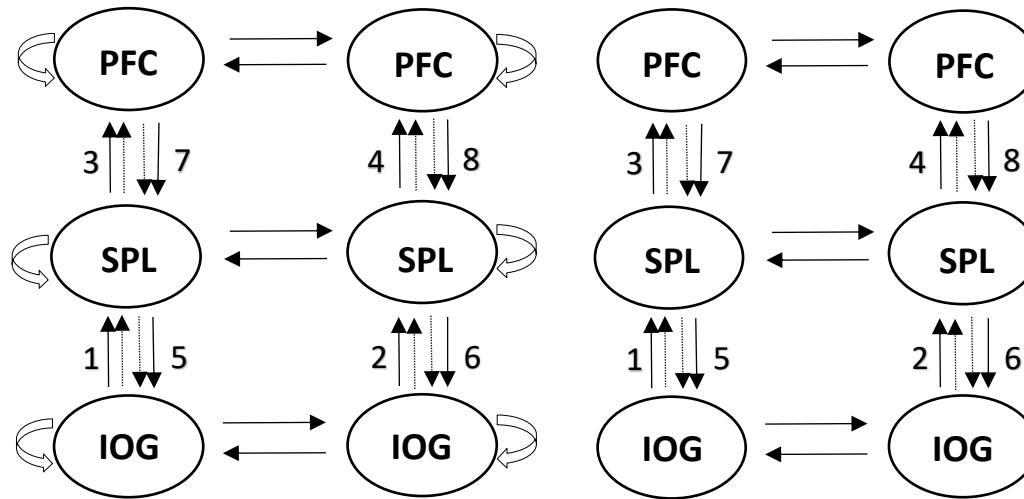**B**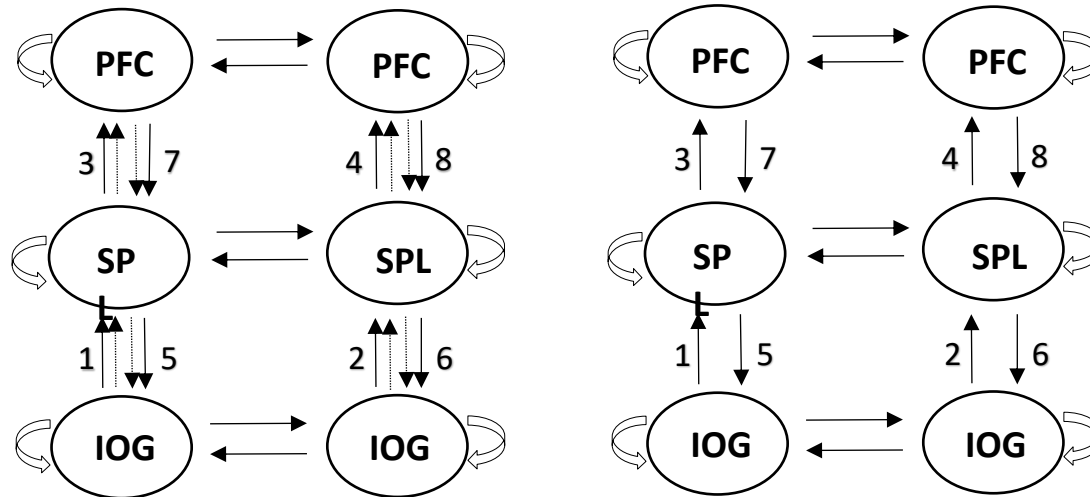

**Supplementary Figure 4: Models tested by Bayesian model selection – step 4: inclusion of intrinsic modulation at the source or not.** Intrinsic source modelling versus no intrinsic source modelling with non-linear connections (A) and without (B). Numbers 1-8 refer to connection order for parameter estimates as displayed in Figures 2 and 3. PFC = Prefrontal cortex, SPL = Superior parietal lobule, IOG = Inferior occipital gyrus. Arrows = linear coupling, Dashed arrows = non-linear coupling.

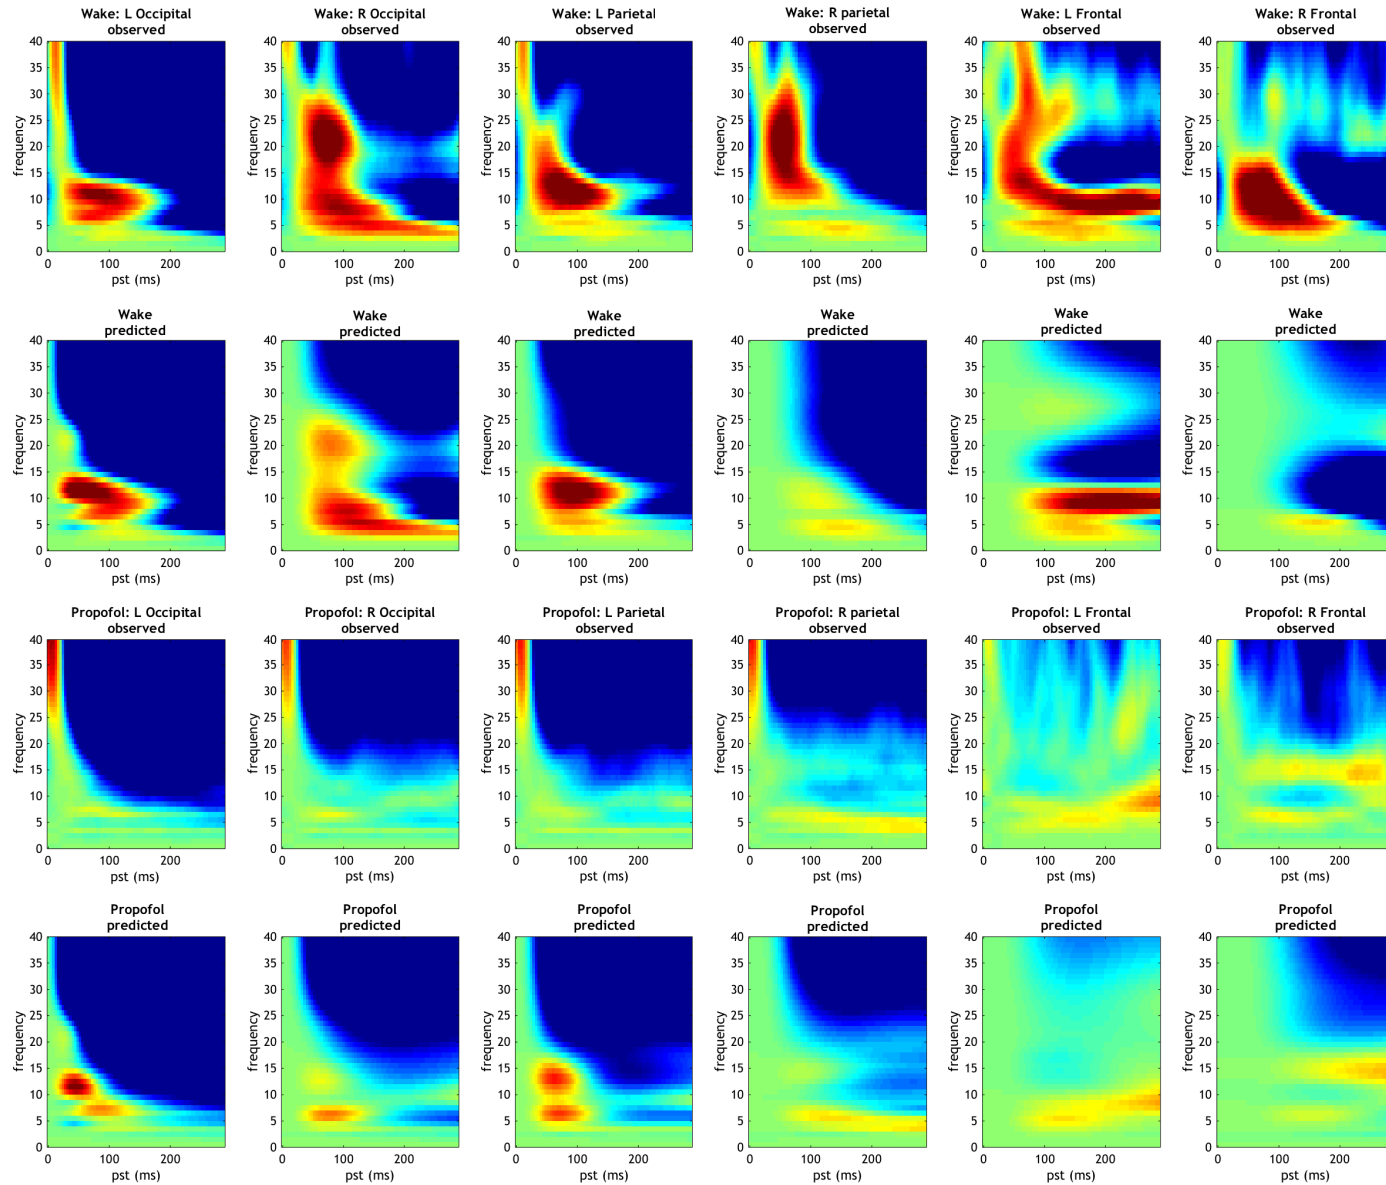

**Supplementary Figure 5:** Example of source reconstructed time frequency (observed) and DCM of the induced response (predicted) of occipital TMS in wake and propofol-induced unresponsiveness from a single subject. Columns refer to left occipital, right occipital, left parietal, right parietal, left frontal and right frontal regions respectively.

Amplitude  
(microVolts)

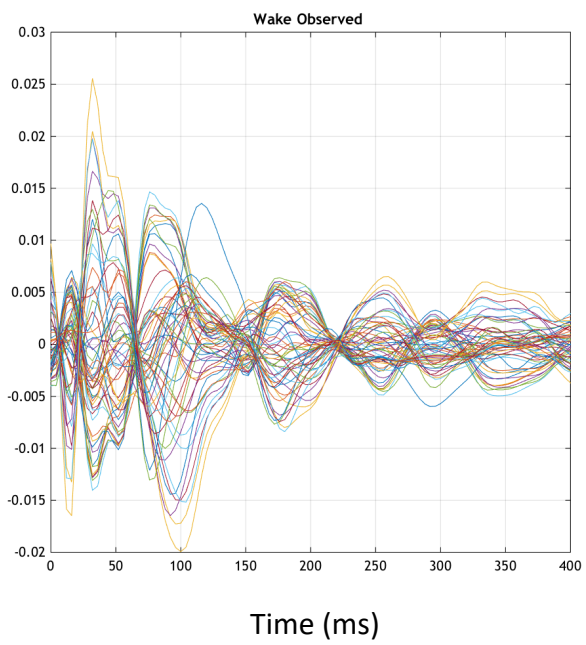

Amplitude  
(microVolts)

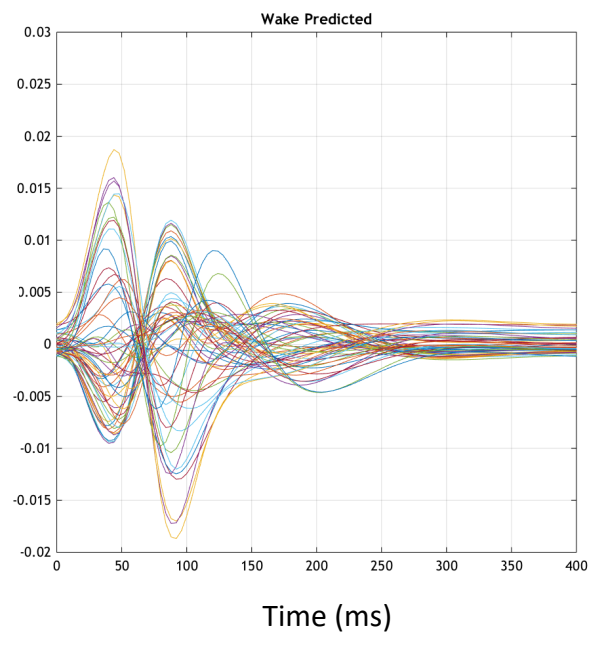

Amplitude  
(microVolts)

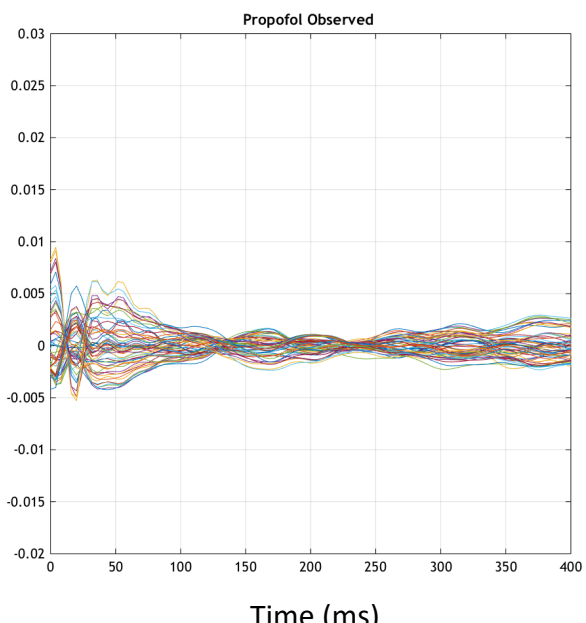

Amplitude  
(microVolts)

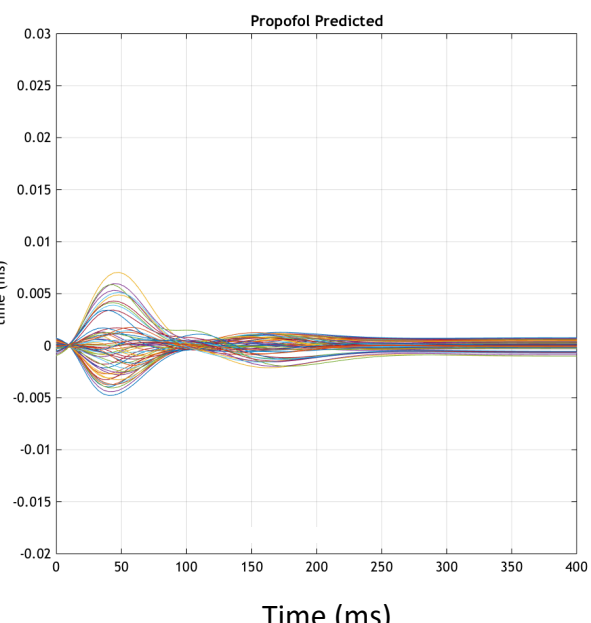

**Supplementary Figure 6:  
Example of source  
reconstructed ERP  
(observed) and DCM  
of the ERP (predicted)  
of occipital TMS in wake  
and propofol-induced  
unresponsiveness from a  
representative subject.**
